# Supplementary material for: Comparative Analysis of Plastid Genomes in the Non-photosynthetic Genus Thismia Reveals Ongoing Gene Set Reduction
Source: Front Plant Sci. 2021 Mar 16;12:602598. doi: 10.3389/fpls.2021.602598 (PMC8009136; doi:10.3389/fpls.2021.602598)
Supplement: Supplementary Table 1 — Material used in this study, sequencing settings and accession numbers of plastome sequences. [file Table_1.xls]

## Sheet: Supplementary table 1
Species	Voucher	Geographical origin and label data of sequenced species	Read length	Instrument	Number of reads	NCBI accession number
Thismia alba Holttum ex Jonker	S. Chantanaorrapint 2801 (PSU)	Thailand, Songkhla prov., Ton Nga Chang Waterfall, 06°99'N 100°22'E, c. 500 m, 04.10.2013	150+150	Nextseq	40367418	MT943132
Thismia angustimitra Chantanaorr.	S. Chantanaorrapint, C. Promma 3904 (BKF, PSU)	Thailand, Bueng Kan prov., Bungkhla, Phu Wua Wildlife Sanctuary, Nature trail from headquarter, 190–300 m, 18°14'19.40"N 103°57'47.02"E, 16.08.2014	75+75	HiSeq4000	24439862	MT943130
Thismia annamensis K.Larsen & Aver.	L. Averyanov, T.V. Thao, N.T. Vinh HLF 5510 (LE, holotype)	Vietnam, Dak Nong prov., Dak Glong distr., Dak Plao munic., Ta Dung Nature Reserve, c. 700-750 m, 11°51'47"N 107°56'59"E, 04.11.2005	150+150	Nextseq	2447643	MT943129
Thismia cornuta Hroneš, Sochor & Dančák	M. Sochor, M. Hroneš, M. Dančák, Z. Egertová, J.R. Pasan BOR2/17 (SAR, holotype; OL, isotype)	Malaysia, Borneo, Sarawak, Kelabit Highlands, Pa'Umor village, Anak Kadi Ridge, 4.4 km SSE of the village, 03°42'01"N 115°31'28"E, 1195 m, 13.01.2017	150+150	Nextseq	32077204	MT943131
Thismia filiformis Chantanaorr.	S. Chantanaorrapint & C. Promma 3928 (PSU)	Thailand, Prachinburi prov., Khao Yai National Park, Pha Tabak Waterfall, c. 710 m, 14°21'52.01"N 101°20'48.51"E, 19.08.2014	150+150	HiSeq4000	21747016	MT936983
Thismia gardneriana Hook.f. ex Thwaites	S. Chantanaorrapint & C. Promma 3903 (PSU)	Thaiand, Phangnga prov., Khao Lak National Park, Hin Lad waterfall, c. 200 m, 08°35'12.59"N 98°27'05.22"E, 04.08.2014	150+150	HiSeq4000	24824790	MT943140
Thismia hawkesii W.E.Cooper	W. Cooper 2407, R. Jensen, B. Hyland, T. Hawkes, T. de Groot, B. Gray (CNS, holotype)	Australia, Queensland, Cook distr., Baldy Mountain Forest Reserve, Herberton Range, near Atherton, 29.01.2017	125+125	HiSeq2500	5278364	MT936984
Thismia hexagona Dančák, Hroneš, Kobrlová & Sochor	M. Hroneš s.n. (photograph: OL)	Brunei, Temburong distr., Kuala Belalong, eastern ridge of Sungai Belalong, near its confluence with Sungai Temburong, ecological plot 1, 04°32.952'N 115°09.792'E, 26.01.2015	125+125, 150+150	Hiseq2500, Nextseq	3290198	MT943134
Thismia hongkongensis S.S.Mar & R.M.K.Saunders	S.S. Mar 3 (HK, paratype)	China, Hong Kong, Tai Po Kau Nature Reserve, New Territories, 22°25'N 114°11'E, 16.11.2015	150+150	Nextseq	33994504	MT943133
Thismia kelabitiana Dančák, Hroneš & Sochor	M. Sochor, M. Hroneš, M. Dančák, Z. Egertová, J.R. Pasan BOR1/17 (SAR, holotype; OL: 35272, isotype)	Malaysia, Borneo, Sarawak, Kelabit Highlands, Pa'Umor village, Anak Kadi Ridge, 4.4 km SSE of the village, 1195 m, 03°42'N 115°31'E, 13.01.2017	150+150	Nextseq	32939936	MT936982
Thismia lanternata W.E.Cooper	W. Cooper 2403, R. Jensen, T. Hawkes, T. de Groot (CNS, holotype)	Australia, Queensland, Cook distr., Ty-Gwyn, Chilverton near Ravenshoe, 29.01.2017	125+125	HiSeq2500	4495034	MT936985
Thismia mucronata Nuraliev	M.S. Nuraliev 813 (MW, holotype)	Vietnam, Lam Dong prov., Bao Lam distr., Loc Bac munic., 22.2 km NNW of Bao Loc town, forest, not far from river, c. 1000 m, 11°44'18"N 107°43'22"E, 13.04.2013	255+255	Miseq	1312880	MT943141
Thismia neptunis Becc.	M. Sochor, Z. Egertová BOR51/17 (OL: 35279)	Malaysia, Borneo, Sarawak, Kuching, Kubah National Park, 0.4 km NE of Matang Wildlife Centre, 01°36'41"N 110°09'48"E, 38 m, 26.01.2017	125+125	Hiseq2500	2677326	MT943135, MT943136
Thismia okhaensis Luu, Tich, G.Tran & Đinh	N.T. Tich, T. Gioi, D.Q. Diep, L.H. Truong, N.T. Trung KH 638B (SGN, holotype)	Khanh Hoa prov., Khanh Son distr., Khanh Son Protection Forest, O Kha Valley, 800 m, 12°02'57"N 108°59'10"E, 12.07.2013	125+125, 150+150	Hiseq2500, Nextseq	2669116	MT943137, MT943139
Thismia puberula Nuraliev	S.V. Yudina, M.S. Nuraliev 15 (MW)	Vietnam, Dak Lak prov., Lak distr., Bong Krang munic., Chu Yang Sin National Park, 12 km S of Krong Kmar village, forest, near river, 1098 m, 12°23'41"N 108°20'55"E, 27.05.2019	150+150	Nextseq	32113236	MT747830
Thismia thaithongiana Chantanaorr. & Suddee	S. Chantanaorrapint 2755 (PSU, paratype)	Thailand, Tak prov., Umphang, Doi Hua Mot, c. 859 m, 15°58'33.7"N 98°50'14.4"E, 19.09.2014	150+150	Nextseq	29750200	MT943142
Thismia viridistriata Sochor, Hroneš & Dančák	M. Sochor, M. Hroneš, M. Dančák, Z. Egertová, J.R. Pasan BOR3/17 (SAR, paratype)	Malaysia, Borneo, Sarawak, Kelabit Highlands, Pa'Umor village, Anak Kadi Ridge, 4.4 km SSE of the village, 1195 m, 03°42'01"N 115°31'28"E, 13.01.2017	150+150	Nextseq	30832240	MT943138
Supplementary Table 1. Species sampled in this study, collection and sequencing details and NCBI accession numbers

## Sheet: Supplementary table 2
name	sequence	location	region
Thism-C2-F	CGCTGGTTAGTTAAGTATAAAGAG	4451-4474	LSC
Thism-C1-R	ATCAAAAACTATGAATCTCTAGGAG	4871-4847, 18521-18545	IR
Thism-C2-R	AAATTCCTCACTGCTGCTCTAA	148-127	LSC
Thism-C1-F	CATCTAGAAAGCCGTATGTTT	10574-10594, 12818-12798	IR
Thism-C7+C6-R	AACTCCGGCTCTAAAAATAGTTT	10872- 10850	SSC
Thism-C7+C6-F	GGAGCAAGACAATTAGTTAATCATAG	12501-12526	SSC
Supplementary Table 2. Primers used for the verification of IR and SC regions in T. mucronata.

## Sheet: Supplementary Table 3
Full sequences
Species	accD	rpl2_1	rpl2_2	rps2	rps3	rps4	rps8	rps12_5'	rps12_3'	rps18	rrn5	rrn16	rrn23	trnE-UUC	trnfM-CAU		+	present
T. filiformis	+	+	+	+	-	+	+	+	+	-	+	+	+	+	+		-	absent
T. gardneriana	+	+	+	+	+	+	+	+	+	+	+	+	+	+	+		P	pseudogene
T. hawkesii	+	+	+	-	+	+	+	+	+	+	+	+	+	+	+		F	fragment
T. lanternata	+	+	+	+	+	+	+	+	+	+	+	+	+	+	+		?	not found
T. mucronata	+	+	+	+	+	+	+	+	+	+	+	+	+	+	+
T. puberula	+	+	+	+	+	+	+	+	+	+	+	+	+	+	+
T. tentaculata	+	+	+	+	+	+	+	+	+	+	+	+	+	+	+
T. thaithongiana	+	+	+	-	+	+	+	+	+	+	-	+	+	+	-
Partial sequences
Species	accD	rpl2_1	rpl2_2	rps2	rps3	rps4	rps8	rps12_5'	rps12_3'	rps18	rrn5	rrn16	rrn23	trnE-UUC	trnfM-CAU
T. alba	+	+	+	+	?	+	F	+	+	-	+	+	+	+	+
T. angustimitra	+	+	+	+	F	+	+	+	+	+	+	+	+	+	+
T. annamensis	+	+	?	+	?	?	?	+	+	+	+	+	+	+	?
T. cornuta	+	+	?	+	?	?	?	+	+	+	+	F	F	+	+
T. hexagona	+	+	+	+	?	?	?	+	+	-	+	F	?	+	+
T. hongkongensis	+	+	+	P	+	+	+	+	+	+	+	+	+	+	+
T. kelabitiana	+	+	?	+	F	+	-	+	+	+	+	?	F	+	+
T. neptunis	+	+	+	+	?	?	?	+	?	P	?	?	?	+	+
T. okhaensis	+	+	F	+	?	F	?	+	?	+	?	+	F	+	+
T. viridistriata	+	+	?	+	?	?	?	+	+	+	+	?	F	+	?
Supplementary table 3. The presence of genes in Thismia plastomes. - denotes missing gene, P - pseudogene, F - fragment (gene not assembled completely), ? - gene status unknown (the region of the plastome where this gene is supposed to be, is not found in the assembly).

## Sheet: Supplementary Table 4
	accD	rpl2	rps2	rps3	rps4	rps8	rps12	rps18
T. filiformis	Carboxyl transferase domain	Ribosomal Proteins L2, RNA binding domain, Ribosomal Proteins L2, C-terminal domain	Ribosomal protein S2	-	S4 domain	Ribosomal protein S8	Ribosomal protein S12/S23	N/A (gene absent)
T. gardneriana	Carboxyl transferase domain	Ribosomal Proteins L2, RNA binding domain, Ribosomal Proteins L2, C-terminal domain	Ribosomal protein S2	Ribosomal protein S3, C-terminal domain	S4 domain	Ribosomal protein S8	Ribosomal protein S12/S23	Ribosomal protein S18
T. hawkesii	Carboxyl transferase domain	Ribosomal Proteins L2, RNA binding domain, Ribosomal Proteins L2, C-terminal domain	N/A (gene absent)	Ribosomal protein S3, C-terminal domain	S4 domain	Ribosomal protein S8	Ribosomal protein S12/S23	Ribosomal protein S18
T. lanternata	Carboxyl transferase domain	Ribosomal Proteins L2, RNA binding domain, Ribosomal Proteins L2, C-terminal domain	Ribosomal protein S2	no matches	S4 domain	Ribosomal protein S8	Ribosomal protein S12/S23	Ribosomal protein S18
T. mucronata	Carboxyl transferase domain	Ribosomal Proteins L2, RNA binding domain, Ribosomal Proteins L2, C-terminal domain	Ribosomal protein S2	no matches	S4 domain	Ribosomal protein S8	Ribosomal protein S12/S23	Ribosomal protein S18
T. puberula	Carboxyl transferase domain	Ribosomal Proteins L2, RNA binding domain, Ribosomal Proteins L2, C-terminal domain	Ribosomal protein S2	no matches	S4 domain	Ribosomal protein S8	Ribosomal protein S12/S23	Ribosomal protein S18
T. tentaculata	Carboxyl transferase domain	Ribosomal Proteins L2, RNA binding domain, Ribosomal Proteins L2, C-terminal domain	Ribosomal protein S2	no matches	S4 domain	Ribosomal protein S8	no matches	Ribosomal protein S18
T. thaithongiana	Carboxyl transferase domain	Ribosomal Proteins L2, RNA binding domain, Ribosomal Proteins L2, C-terminal domain	N/A (gene absent)	no matches	S4 domain	Ribosomal protein S8	Ribosomal protein S12/S23	Ribosomal protein S18
T. alba	Carboxyl transferase domain	N/A (gene not assembled completely)	Ribosomal protein S2	N/A (gene not assembled)	S4 domain	N/A (gene not assembled completely)	Ribosomal protein S12/S23	N/A (gene absent)
T. angustimitra	Carboxyl transferase domain	Ribosomal Proteins L2, RNA binding domain, Ribosomal Proteins L2, C-terminal domain	Ribosomal protein S2	N/A (gene not assembled completely)	S4 domain	Ribosomal protein S8	Ribosomal protein S12/S23	Ribosomal protein S18
T. annamensis	Carboxyl transferase domain	N/A (gene not assembled completely)	Ribosomal protein S2	N/A (gene not assembled)	N/A (gene not assembled)	N/A (gene not assembled)	Ribosomal protein S12/S23	Ribosomal protein S18
T. cornuta	Carboxyl transferase domain	N/A (gene not assembled completely)	Ribosomal protein S2	N/A (gene not assembled)	N/A (gene not assembled)	N/A (gene not assembled)	Ribosomal protein S12/S23	Ribosomal protein S18
T. hexagona	Carboxyl transferase domain	Ribosomal Proteins L2, RNA binding domain, Ribosomal Proteins L2, C-terminal domain	Ribosomal protein S2	N/A (gene not assembled)	N/A (gene not assembled)	N/A (gene not assembled)	Ribosomal protein S12/S23	N/A (gene absent)
T. hongkongensis	Carboxyl transferase domain	Ribosomal Proteins L2, RNA binding domain, Ribosomal Proteins L2, C-terminal domain	N/A (pseudogene)	Ribosomal protein S3, C-terminal domain	S4 domain	Ribosomal protein S8	Ribosomal protein S12/S23	Ribosomal protein S18
T. kelabitiana	Carboxyl transferase domain	N/A (gene not assembled completely)	Ribosomal protein S2	N/A (gene not assembled completely)	S4 domain	N/A (gene absent)	Ribosomal protein S12/S23	Ribosomal protein S18
T. neptunis	Carboxyl transferase domain	Ribosomal Proteins L2, RNA binding domain, Ribosomal Proteins L2, C-terminal domain	Ribosomal protein S2	N/A (gene not assembled)	N/A (gene not assembled)	N/A (gene not assembled)	N/A (gene not assembled completely)	N/A (pseudogene)
T. okhaensis	Carboxyl transferase domain	N/A (gene not assembled completely)	Ribosomal protein S2	N/A (gene not assembled)	N/A (gene not assembled completely)	N/A (gene not assembled)	N/A (gene not assembled completely)	Ribosomal protein S18
T. viridistriata	Carboxyl transferase domain	N/A (gene not assembled completely)	Ribosomal protein S2	N/A (gene not assembled)	N/A (gene not assembled)	N/A (gene not assembled)	Ribosomal protein S12/S23	Ribosomal protein S18
Supplementary Table 4. Results of Pfam-a search for Thismia plastid genes.

## Sheet: Supplementary Table 5
rrn16
Species	Thismia alba	Thismia annamensis	Thismia hongkongensis	Thismia angustimitra	Thismia filiformis	Thismia gardneriana	Thismia hawkesii	Thismia lanternata	Thismia mucronata	Thismia puberula	Thismia thaithongiana	Thismia tentaculata
Thsmia alba	ID	0.816	0.772	0.768	0.811	0.777	0.779	0.793	0.782	0.785	0.707	0.777
Thismia annamensis	0.816	ID	0.88	0.864	0.924	0.88	0.855	0.885	0.886	0.885	0.723	0.878
Thismia hongkongensis	0.772	0.88	ID	0.883	0.858	0.879	0.866	0.884	0.904	0.903	0.717	0.899
Thismia angustimitra	0.768	0.864	0.883	ID	0.855	0.874	0.864	0.892	0.941	0.943	0.731	0.884
Thismia filiformis	0.811	0.924	0.858	0.855	ID	0.864	0.846	0.872	0.867	0.867	0.728	0.865
Thismia gardneriana	0.777	0.88	0.879	0.874	0.864	ID	0.858	0.883	0.895	0.892	0.732	0.887
Thismia hawkesii	0.779	0.855	0.866	0.864	0.846	0.858	ID	0.928	0.882	0.88	0.731	0.87
Thismia lanternata	0.793	0.885	0.884	0.892	0.872	0.883	0.928	ID	0.914	0.91	0.739	0.898
Thismia mucronata	0.782	0.886	0.904	0.941	0.867	0.895	0.882	0.914	ID	0.995	0.739	0.912
Thismia puberula	0.785	0.885	0.903	0.943	0.867	0.892	0.88	0.91	0.995	ID	0.74	0.912
Thismia thaithongiana	0.707	0.723	0.717	0.731	0.728	0.732	0.731	0.739	0.739	0.74	ID	0.734
Thismia tentaculata	0.777	0.878	0.899	0.884	0.865	0.887	0.87	0.898	0.912	0.912	0.734	ID
rrn23
	Thismia angustimitra	Thismia filiformis	Thismia gardneriana	Thismia hawkesii	Thismia lanternata	Thismia mucronata	Thismia puberula	Thismia thaithongiana	Thismia tentaculata	Thismia alba	Thismia annamensis	Thismia hongkongensis
Thismia angustimitra	ID	0.819	0.818	0.81	0.825	0.886	0.887	0.665	0.83	0.786	0.826	0.828
Thismia filiformis	0.819	ID	0.823	0.811	0.827	0.827	0.827	0.67	0.837	0.846	0.901	0.835
Thismia gardneriana	0.818	0.823	ID	0.849	0.857	0.856	0.85	0.645	0.847	0.779	0.846	0.845
Thismia hawkesii	0.81	0.811	0.849	ID	0.924	0.849	0.847	0.657	0.847	0.776	0.838	0.845
Thismia lanternata	0.825	0.827	0.857	0.924	ID	0.865	0.863	0.656	0.867	0.78	0.856	0.868
Thismia mucronata	0.886	0.827	0.856	0.849	0.865	ID	0.988	0.659	0.87	0.789	0.855	0.866
Thismia puberula	0.887	0.827	0.85	0.847	0.863	0.988	ID	0.659	0.87	0.789	0.857	0.866
Thismia thaithongiana	0.665	0.67	0.645	0.657	0.656	0.659	0.659	ID	0.648	0.678	0.663	0.661
Thismia tentaculata	0.83	0.837	0.847	0.847	0.867	0.87	0.87	0.648	ID	0.792	0.871	0.9
Thismia alba	0.786	0.846	0.779	0.776	0.78	0.789	0.789	0.678	0.792	ID	0.838	0.789
Thismia annamensis	0.826	0.901	0.846	0.838	0.856	0.855	0.857	0.663	0.871	0.838	ID	0.873
Thismia hongkongensis	0.828	0.835	0.845	0.845	0.868	0.866	0.866	0.661	0.9	0.789	0.873	ID
rps12 3'
	Thismia alba	Thismia angustimitra	Thismia annamensis	Thismia cornuta	Thismia filiformis	Thismia gardneriana	Thismia hawkesii	Thismia hexagona	Thismia hongkongensis	Thismia kelabitiana	Thismia lanternata	Thismia mucronata	Thismia puberula	Thismia thaithongiana	Thismia tentaculata	Thismia viridistriata
Thismia alba	ID	0.842	0.848	0.861	0.871	0.825	0.822	0.842	0.838	0.825	0.838	0.835	0.835	0.681	0.136	0.886
Thismia angustimitra	0.842	ID	0.976	0.976	0.947	0.96	0.967	0.983	0.963	0.967	0.848	0.976	0.976	0.68	0.115	0.858
Thismia annamensis	0.848	0.976	ID	0.986	0.937	0.953	0.96	0.983	0.98	0.96	0.845	0.957	0.957	0.671	0.118	0.848
Thismia cornuta	0.861	0.976	0.986	ID	0.937	0.957	0.957	0.98	0.967	0.957	0.845	0.957	0.957	0.677	0.118	0.855
Thismia filiformis	0.871	0.947	0.937	0.937	ID	0.917	0.924	0.94	0.924	0.927	0.809	0.93	0.93	0.718	0.123	0.903
Thismia gardneriana	0.825	0.96	0.953	0.957	0.917	ID	0.953	0.957	0.947	0.957	0.845	0.95	0.953	0.677	0.105	0.848
Thismia hawkesii	0.822	0.967	0.96	0.957	0.924	0.953	ID	0.97	0.953	0.983	0.875	0.963	0.967	0.68	0.115	0.878
Thismia hexagona	0.842	0.983	0.983	0.98	0.94	0.957	0.97	ID	0.963	0.967	0.855	0.967	0.963	0.671	0.111	0.855
Thismia hongkongensis	0.838	0.963	0.98	0.967	0.924	0.947	0.953	0.963	ID	0.953	0.835	0.95	0.95	0.687	0.115	0.845
Thismia kelabitiana	0.825	0.967	0.96	0.957	0.927	0.957	0.983	0.967	0.953	ID	0.865	0.963	0.967	0.684	0.118	0.875
Thismia lanternata	0.838	0.848	0.845	0.845	0.809	0.845	0.875	0.855	0.835	0.865	ID	0.845	0.848	0.638	0.125	0.858
Thismia mucronata	0.835	0.976	0.957	0.957	0.93	0.95	0.963	0.967	0.95	0.963	0.845	ID	0.996	0.694	0.118	0.858
Thismia puberula	0.835	0.976	0.957	0.957	0.93	0.953	0.967	0.963	0.95	0.967	0.848	0.996	ID	0.694	0.118	0.861
Thismia thaithongiana	0.681	0.68	0.671	0.677	0.718	0.677	0.68	0.671	0.687	0.684	0.638	0.694	0.694	ID	0.099	0.711
Thismia tentaculata	0.136	0.115	0.118	0.118	0.123	0.105	0.115	0.111	0.115	0.118	0.125	0.118	0.118	0.099	ID	0.126
Thismia viridistriata	0.886	0.858	0.848	0.855	0.903	0.848	0.878	0.855	0.845	0.875	0.858	0.858	0.861	0.711	0.126	ID
rrn5
	Thismia angustimitra	Thismia filiformis	Thismia gardneriana	Thismia hawkesii	Thismia lanternata	Thismia mucronata	Thismia puberula	Thismia alba	Thismia annamensis	Thismia cornuta	Thismia hexagona	Thismia kelabitiana	Thismia tentaculata	Thismia hongkongensis	Thismia viridistriata
Thismia angustimitra	ID	0.961	0.951	0.951	0.961	1,000	1,000	0.902	0.961	0.951	0.961	0.961	0.951	0.941	0.902
Thismia filiformis	0.961	ID	0.99	0.961	0.99	0.961	0.961	0.941	1,000	0.99	1,000	1,000	0.99	0.98	0.932
Thismia gardneriana	0.951	0.99	ID	0.951	0.98	0.951	0.951	0.932	0.99	0.98	0.99	0.99	0.98	0.97	0.922
Thismia hawkesii	0.951	0.961	0.951	ID	0.97	0.951	0.951	0.922	0.961	0.951	0.961	0.961	0.951	0.941	0.932
Thismia lanternata	0.961	0.99	0.98	0.97	ID	0.961	0.961	0.932	0.99	0.98	0.99	0.99	0.98	0.97	0.941
Thismia mucronata	1,000	0.961	0.951	0.951	0.961	ID	1,000	0.902	0.961	0.951	0.961	0.961	0.951	0.941	0.902
Thismia puberula	1,000	0.961	0.951	0.951	0.961	1,000	ID	0.902	0.961	0.951	0.961	0.961	0.951	0.941	0.902
Thismia alba	0.902	0.941	0.932	0.922	0.932	0.902	0.902	ID	0.941	0.95	0.941	0.941	0.932	0.932	0.902
Thismia annamensis	0.961	1,000	0.99	0.961	0.99	0.961	0.961	0.941	ID	0.99	1,000	1,000	0.99	0.98	0.932
Thismia cornuta	0.951	0.99	0.98	0.951	0.98	0.951	0.951	0.95	0.99	ID	0.99	0.99	0.98	0.97	0.922
Thismia hexagona	0.961	1,000	0.99	0.961	0.99	0.961	0.961	0.941	1,000	0.99	ID	1,000	0.99	0.98	0.932
Thismia kelabitiana	0.961	1,000	0.99	0.961	0.99	0.961	0.961	0.941	1,000	0.99	1,000	ID	0.99	0.98	0.932
Thismia tentaculata	0.951	0.99	0.98	0.951	0.98	0.951	0.951	0.932	0.99	0.98	0.99	0.99	ID	0.97	0.922
Thismia hongkongensis	0.941	0.98	0.97	0.941	0.97	0.941	0.941	0.932	0.98	0.97	0.98	0.98	0.97	ID	0.932
Thismia viridistriata	0.902	0.932	0.922	0.932	0.941	0.902	0.902	0.902	0.932	0.922	0.932	0.932	0.922	0.932	ID
rps2
	Thismia alba	Thismia angustimitra	Thismia annamensis	Thismia cornuta	Thismia filiformis	Thismia gardneriana	Thismia hexagona	Thismia hongkongensis	Thismia kelabitiana	Thismia lanternata	Thismia mucronata	Thismia neptunis	Thismia okhaensis	Thismia puberula
Thismia alba	ID	0.844	0.895	0.856	0.895	0.852	0.846	0.847	0.846	0.845	0.861	0.852	0.86	0.858
Thismia angustimitra	0.844	ID	0.916	0.955	0.915	0.924	0.875	0.922	0.91	0.936	0.973	0.921	0.968	0.966
Thismia annamensis	0.895	0.916	ID	0.93	0.972	0.894	0.925	0.91	0.906	0.908	0.935	0.914	0.932	0.93
Thismia cornuta	0.856	0.955	0.93	ID	0.933	0.91	0.891	0.921	0.908	0.927	0.954	0.93	0.949	0.948
Thismia filiformis	0.895	0.915	0.972	0.933	ID	0.888	0.927	0.904	0.9	0.899	0.933	0.912	0.93	0.929
Thismia gardneriana	0.852	0.924	0.894	0.91	0.888	ID	0.847	0.907	0.897	0.908	0.935	0.877	0.937	0.935
Thismia hexagona	0.846	0.875	0.925	0.891	0.927	0.847	ID	0.863	0.863	0.86	0.888	0.876	0.885	0.883
Thismia hongkongensis	0.847	0.922	0.91	0.921	0.904	0.907	0.863	ID	0.893	0.911	0.938	0.888	0.937	0.938
Thismia kelabitiana	0.846	0.91	0.906	0.908	0.9	0.897	0.863	0.893	ID	0.938	0.924	0.89	0.922	0.921
Thismia lanternata	0.845	0.936	0.908	0.927	0.899	0.908	0.86	0.911	0.938	ID	0.938	0.894	0.937	0.935
Thismia mucronata	0.861	0.973	0.935	0.954	0.933	0.935	0.888	0.938	0.924	0.938	ID	0.913	0.995	0.993
Thismia neptunis	0.852	0.921	0.914	0.93	0.912	0.877	0.876	0.888	0.89	0.894	0.913	ID	0.911	0.91
Thismia okhaensis	0.86	0.968	0.932	0.949	0.93	0.937	0.885	0.937	0.922	0.937	0.995	0.911	ID	0.998
Thismia puberula	0.858	0.966	0.93	0.948	0.929	0.935	0.883	0.938	0.921	0.935	0.993	0.91	0.998	ID
rps12 5'
	Thismia angustimitra	Thismia filiformis	Thismia gardneriana	Thismia hawkesii	Thismia lanternata	Thismia mucronata	Thismia puberula	Thismia thaithongiana	Thismia alba	Thismia annamensis	Thismia cornuta	Thismia hexagona	Thismia hongkongensis	Thismia kelabitiana	Thismia neptunis	Thismia okhaensis	Thismia tentaculata	Thismia viridistriata
Thismia angustimitra	ID	0.874	0.911	0.903	0.896	0.931	0.992	0.603	0.874	0.918	0.911	0.874	0.93	0.888	0.903	0.992	0.837	0.896
Thismia filiformis	0.874	ID	0.918	0.911	0.918	0.874	0.866	0.555	0.933	0.948	0.94	0.948	0.851	0.896	0.94	0.866	0.844	0.903
Thismia gardneriana	0.911	0.918	ID	0.962	0.955	0.903	0.903	0.57	0.925	0.97	0.962	0.925	0.911	0.948	0.955	0.903	0.896	0.955
Thismia hawkesii	0.903	0.911	0.962	ID	0.992	0.896	0.896	0.562	0.925	0.962	0.955	0.918	0.888	0.97	0.948	0.896	0.888	0.977
Thismia lanternata	0.896	0.918	0.955	0.992	ID	0.888	0.888	0.555	0.933	0.955	0.948	0.925	0.881	0.962	0.948	0.888	0.881	0.97
Thismia mucronata	0.931	0.874	0.903	0.896	0.888	ID	0.939	0.568	0.874	0.918	0.911	0.881	0.886	0.896	0.918	0.939	0.837	0.888
Thismia puberula	0.992	0.866	0.903	0.896	0.888	0.939	ID	0.595	0.866	0.911	0.903	0.866	0.922	0.881	0.911	1,000	0.829	0.888
Thismia thaithongiana	0.603	0.555	0.57	0.562	0.555	0.568	0.595	ID	0.548	0.57	0.562	0.548	0.581	0.562	0.555	0.595	0.603	0.57
Thismia alba	0.874	0.933	0.925	0.925	0.933	0.874	0.866	0.548	ID	0.955	0.948	0.94	0.851	0.903	0.948	0.866	0.866	0.918
Thismia annamensis	0.918	0.948	0.97	0.962	0.955	0.918	0.911	0.57	0.955	ID	0.992	0.955	0.896	0.948	0.985	0.911	0.896	0.955
Thismia cornuta	0.911	0.94	0.962	0.955	0.948	0.911	0.903	0.562	0.948	0.992	ID	0.948	0.888	0.94	0.977	0.903	0.888	0.948
Thismia hexagona	0.874	0.948	0.925	0.918	0.925	0.881	0.866	0.548	0.94	0.955	0.948	ID	0.851	0.911	0.948	0.866	0.859	0.911
Thismia hongkongensis	0.93	0.851	0.911	0.888	0.881	0.886	0.922	0.581	0.851	0.896	0.888	0.851	ID	0.874	0.881	0.922	0.822	0.896
Thismia kelabitiana	0.888	0.896	0.948	0.97	0.962	0.896	0.881	0.562	0.903	0.948	0.94	0.911	0.874	ID	0.933	0.881	0.888	0.948
Thismia neptunis	0.903	0.94	0.955	0.948	0.948	0.918	0.911	0.555	0.948	0.985	0.977	0.948	0.881	0.933	ID	0.911	0.881	0.94
Thismia okhaensis	0.992	0.866	0.903	0.896	0.888	0.939	1,000	0.595	0.866	0.911	0.903	0.866	0.922	0.881	0.911	ID	0.829	0.888
Thismia tentaculata	0.837	0.844	0.896	0.888	0.881	0.837	0.829	0.603	0.866	0.896	0.888	0.859	0.822	0.888	0.881	0.829	ID	0.881
Thismia viridistriata	0.896	0.903	0.955	0.977	0.97	0.888	0.888	0.57	0.918	0.955	0.948	0.911	0.896	0.948	0.94	0.888	0.881	ID
rps18
	Thismia annamensis	Thismia cornuta	Thismia angustimitra	Thismia mucronata	Thismia okhaensis	Thismia puberula	Thismia gardneriana	Thismia tentaculata	Thismia hongkongensis	Thismia hawkesii	Thismia kelabitiana	Thismia lanternata	Thismia viridistriata	Thismia neptunis	Thismia thaithongiana
Thismia annamensis	ID	0.982	0.95	0.955	0.959	0.959	0.946	0.937	0.928	0.883	0.91	0.892	0.883	0.677	0.695
Thismia cornuta	0.982	ID	0.941	0.946	0.95	0.95	0.941	0.928	0.919	0.874	0.901	0.883	0.874	0.677	0.695
Thismia angustimitra	0.95	0.941	ID	0.968	0.973	0.973	0.941	0.932	0.91	0.883	0.914	0.883	0.874	0.668	0.699
Thismia mucronata	0.955	0.946	0.968	ID	0.995	0.995	0.959	0.95	0.932	0.887	0.932	0.896	0.883	0.659	0.708
Thismia okhaensis	0.959	0.95	0.973	0.995	ID	1,000	0.964	0.955	0.937	0.892	0.937	0.901	0.883	0.663	0.708
Thismia puberula	0.959	0.95	0.973	0.995	1,000	ID	0.964	0.955	0.937	0.892	0.937	0.901	0.883	0.663	0.708
Thismia gardneriana	0.946	0.941	0.941	0.959	0.964	0.964	ID	0.95	0.928	0.865	0.905	0.883	0.865	0.672	0.686
Thismia tentaculata	0.937	0.928	0.932	0.95	0.955	0.955	0.95	ID	0.914	0.86	0.896	0.86	0.86	0.654	0.713
Thismia hongkongensis	0.928	0.919	0.91	0.932	0.937	0.937	0.928	0.914	ID	0.852	0.892	0.86	0.843	0.627	0.699
Thismia hawkesii	0.883	0.874	0.883	0.887	0.892	0.892	0.865	0.86	0.852	ID	0.943	0.953	0.929	0.6	0.728
Thismia kelabitiana	0.91	0.901	0.914	0.932	0.937	0.937	0.905	0.896	0.892	0.943	ID	0.962	0.915	0.618	0.738
Thismia lanternata	0.892	0.883	0.883	0.896	0.901	0.901	0.883	0.86	0.86	0.953	0.962	ID	0.929	0.618	0.724
Thismia viridistriata	0.883	0.874	0.874	0.883	0.883	0.883	0.865	0.86	0.843	0.929	0.915	0.929	ID	0.614	0.754
Thismia neptunis	0.677	0.677	0.668	0.659	0.663	0.663	0.672	0.654	0.627	0.6	0.618	0.618	0.614	ID	0.461
Thismia thaithongiana	0.695	0.695	0.699	0.708	0.708	0.708	0.686	0.713	0.699	0.728	0.738	0.724	0.754	0.461	ID
accD
	Thismia angustimitra	Thismia filiformis	Thismia gardneriana	Thismia hawkesii	Thismia lanternata	Thismia mucronata	Thismia puberula	Thismia thaithongiana	Thismia alba	Thismia annamensis	Thismia cornuta	Thismia hexagona	Thismia hongkongensis	Thismia kelabitiana	Thismia neprunis	Thismia okhaensis	Thismia tentaculata	Thismia viridistriata
Thismia angustimitra	ID	0.92	0.931	0.917	0.93	0.955	0.954	0.757	0.885	0.926	0.933	0.913	0.779	0.913	0.918	0.954	0.917	0.889
Thismia filiformis	0.92	ID	0.947	0.922	0.943	0.945	0.944	0.776	0.931	0.972	0.98	0.964	0.793	0.92	0.967	0.944	0.938	0.908
Thismia gardneriana	0.931	0.947	ID	0.937	0.959	0.959	0.958	0.774	0.912	0.954	0.961	0.936	0.801	0.933	0.946	0.958	0.946	0.908
Thismia hawkesii	0.917	0.922	0.937	ID	0.973	0.943	0.942	0.776	0.896	0.932	0.937	0.915	0.783	0.93	0.928	0.942	0.925	0.918
Thismia lanternata	0.93	0.943	0.959	0.973	ID	0.959	0.958	0.775	0.913	0.951	0.958	0.933	0.796	0.945	0.945	0.958	0.947	0.932
Thismia mucronata	0.955	0.945	0.959	0.943	0.959	ID	0.998	0.773	0.91	0.951	0.959	0.932	0.791	0.933	0.944	0.998	0.948	0.909
Thismia puberula	0.954	0.944	0.958	0.942	0.958	0.998	ID	0.772	0.909	0.95	0.958	0.931	0.79	0.932	0.943	1,000	0.947	0.908
Thismia thaithongiana	0.757	0.776	0.774	0.776	0.775	0.773	0.772	ID	0.759	0.777	0.782	0.775	0.697	0.763	0.774	0.772	0.776	0.767
Thismia alba	0.885	0.931	0.912	0.896	0.913	0.91	0.909	0.759	ID	0.935	0.935	0.929	0.774	0.894	0.923	0.909	0.903	0.876
Thismia annamensis	0.926	0.972	0.954	0.932	0.951	0.951	0.95	0.777	0.935	ID	0.985	0.963	0.79	0.926	0.971	0.95	0.942	0.914
Thismia cornuta	0.933	0.98	0.961	0.937	0.958	0.959	0.958	0.782	0.935	0.985	ID	0.969	0.795	0.93	0.981	0.958	0.947	0.917
Thismia hexagona	0.913	0.964	0.936	0.915	0.933	0.932	0.931	0.775	0.929	0.963	0.969	ID	0.792	0.914	0.957	0.931	0.926	0.898
Thismia hongkongensis	0.779	0.793	0.801	0.783	0.796	0.791	0.79	0.697	0.774	0.79	0.795	0.792	ID	0.788	0.786	0.79	0.8	0.765
Thismia kelabitiana	0.913	0.92	0.933	0.93	0.945	0.933	0.932	0.763	0.894	0.926	0.93	0.914	0.788	ID	0.919	0.932	0.918	0.893
Thismia neprunis	0.918	0.967	0.946	0.928	0.945	0.944	0.943	0.774	0.923	0.971	0.981	0.957	0.786	0.919	ID	0.943	0.934	0.907
Thismia okhaensis	0.954	0.944	0.958	0.942	0.958	0.998	1,000	0.772	0.909	0.95	0.958	0.931	0.79	0.932	0.943	ID	0.947	0.908
Thismia tentaculata	0.917	0.938	0.946	0.925	0.947	0.948	0.947	0.776	0.903	0.942	0.947	0.926	0.8	0.918	0.934	0.947	ID	0.895
Thismia viridistriata	0.889	0.908	0.908	0.918	0.932	0.909	0.908	0.767	0.876	0.914	0.917	0.898	0.765	0.893	0.907	0.908	0.895	ID
trnE-UUC
	Thismia alba	Thismia angustimitra	Thismia annamensis	Thismia cornuta	Thismia gardneriana	Thismia hawkesii	Thismia hexagona	Thismia hongkongensis	Thismia kelabitiana	Thismia lanternata	Thismia mucronata	Thismia neptunis	Thismia okhaensis	Thismia puberula	Thismia tentaculata	Thismia thaithongiana	Thismia viridistriata	Thismia hawkesii	Thismia lanternata	Thismia filiformis
Thismia alba	ID	0.931	0.945	0.945	0.945	0.917	0.958	0.945	0.917	0.945	0.945	0.945	0.945	0.945	0.917	0.89	0.931	0.917	0.945	0.945
Thismia angustimitra	0.931	ID	0.986	0.986	0.986	0.931	0.972	0.958	0.958	0.986	0.986	0.986	0.986	0.986	0.958	0.876	0.917	0.931	0.986	0.972
Thismia annamensis	0.945	0.986	ID	1,000	1,000	0.945	0.986	0.972	0.972	1,000	1,000	1,000	1,000	1,000	0.972	0.89	0.931	0.945	1,000	0.986
Thismia cornuta	0.945	0.986	1,000	ID	1,000	0.945	0.986	0.972	0.972	1,000	1,000	1,000	1,000	1,000	0.972	0.89	0.931	0.945	1,000	0.986
Thismia gardneriana	0.945	0.986	1,000	1,000	ID	0.945	0.986	0.972	0.972	1,000	1,000	1,000	1,000	1,000	0.972	0.89	0.931	0.945	1,000	0.986
Thismia hawkesii	0.917	0.931	0.945	0.945	0.945	ID	0.931	0.917	0.917	0.945	0.945	0.945	0.945	0.945	0.917	0.904	0.931	1,000	0.945	0.931
Thismia hexagona	0.958	0.972	0.986	0.986	0.986	0.931	ID	0.986	0.958	0.986	0.986	0.986	0.986	0.986	0.958	0.904	0.945	0.931	0.986	0.986
Thismia hongkongensis	0.945	0.958	0.972	0.972	0.972	0.917	0.986	ID	0.945	0.972	0.972	0.972	0.972	0.972	0.945	0.89	0.931	0.917	0.972	0.972
Thismia kelabitiana	0.917	0.958	0.972	0.972	0.972	0.917	0.958	0.945	ID	0.972	0.972	0.972	0.972	0.972	0.945	0.863	0.904	0.917	0.972	0.958
Thismia lanternata	0.945	0.986	1,000	1,000	1,000	0.945	0.986	0.972	0.972	ID	1,000	1,000	1,000	1,000	0.972	0.89	0.931	0.945	1,000	0.986
Thismia mucronata	0.945	0.986	1,000	1,000	1,000	0.945	0.986	0.972	0.972	1,000	ID	1,000	1,000	1,000	0.972	0.89	0.931	0.945	1,000	0.986
Thismia neptunis	0.945	0.986	1,000	1,000	1,000	0.945	0.986	0.972	0.972	1,000	1,000	ID	1,000	1,000	0.972	0.89	0.931	0.945	1,000	0.986
Thismia okhaensis	0.945	0.986	1,000	1,000	1,000	0.945	0.986	0.972	0.972	1,000	1,000	1,000	ID	1,000	0.972	0.89	0.931	0.945	1,000	0.986
Thismia puberula	0.945	0.986	1,000	1,000	1,000	0.945	0.986	0.972	0.972	1,000	1,000	1,000	1,000	ID	0.972	0.89	0.931	0.945	1,000	0.986
Thismia tentaculata	0.917	0.958	0.972	0.972	0.972	0.917	0.958	0.945	0.945	0.972	0.972	0.972	0.972	0.972	ID	0.863	0.904	0.917	0.972	0.958
Thismia thaithongiana	0.89	0.876	0.89	0.89	0.89	0.904	0.904	0.89	0.863	0.89	0.89	0.89	0.89	0.89	0.863	ID	0.931	0.904	0.89	0.89
Thismia viridistriata	0.931	0.917	0.931	0.931	0.931	0.931	0.945	0.931	0.904	0.931	0.931	0.931	0.931	0.931	0.904	0.931	ID	0.931	0.931	0.931
Thismia hawkesii	0.917	0.931	0.945	0.945	0.945	1,000	0.931	0.917	0.917	0.945	0.945	0.945	0.945	0.945	0.917	0.904	0.931	ID	0.945	0.931
Thismia lanternata	0.945	0.986	1,000	1,000	1,000	0.945	0.986	0.972	0.972	1,000	1,000	1,000	1,000	1,000	0.972	0.89	0.931	0.945	ID	0.986
Thismia filiformis	0.945	0.972	0.986	0.986	0.986	0.931	0.986	0.972	0.958	0.986	0.986	0.986	0.986	0.986	0.958	0.89	0.931	0.931	0.986	ID
rpl2 5'
	Thismia angustimitra	Thismia filiformis	Thismia gardneriana	Thismia hawkesii	Thismia lanternata	Thismia mucronata	Thismia puberula	Thismia thaithongiana	Thismia alba	Thismia annamensis	Thismia cornuta	Thismia hexagona	Thismia hongkongensis	Thismia kelabitiana	Thismia neptunis	Thismia okhaensis	Thismia tentaculata	Thismia viridistriata
Thismia angustimitra	ID	0.314	0.379	0.337	0.941	0.986	0.979	0.398	0.321	0.384	0.382	0.379	0.382	0.384	0.391	0.986	0.386	0.372
Thismia filiformis	0.314	ID	0.345	0.364	0.305	0.317	0.319	0.333	0.356	0.347	0.349	0.34	0.345	0.352	0.349	0.317	0.345	0.347
Thismia gardneriana	0.379	0.345	ID	0.335	0.365	0.375	0.377	0.77	0.34	0.971	0.969	0.938	0.969	0.952	0.962	0.375	0.945	0.959
Thismia hawkesii	0.337	0.364	0.335	ID	0.344	0.337	0.34	0.342	0.306	0.328	0.323	0.33	0.33	0.331	0.321	0.337	0.328	0.333
Thismia lanternata	0.941	0.305	0.365	0.344	ID	0.955	0.948	0.389	0.319	0.372	0.363	0.365	0.372	0.37	0.372	0.955	0.372	0.368
Thismia mucronata	0.986	0.317	0.375	0.337	0.955	ID	0.993	0.398	0.319	0.379	0.377	0.375	0.377	0.379	0.386	1,000	0.382	0.368
Thismia puberula	0.979	0.319	0.377	0.34	0.948	0.993	ID	0.401	0.321	0.382	0.38	0.377	0.38	0.382	0.389	0.993	0.384	0.37
Thismia thaithongiana	0.398	0.333	0.77	0.342	0.389	0.398	0.401	ID	0.33	0.768	0.765	0.739	0.775	0.781	0.763	0.398	0.747	0.775
Thismia alba	0.321	0.356	0.34	0.306	0.319	0.319	0.321	0.33	ID	0.338	0.333	0.345	0.34	0.336	0.33	0.319	0.325	0.33
Thismia annamensis	0.384	0.347	0.971	0.328	0.372	0.379	0.382	0.768	0.338	ID	0.988	0.959	0.973	0.962	0.981	0.379	0.95	0.964
Thismia cornuta	0.382	0.349	0.969	0.323	0.363	0.377	0.38	0.765	0.333	0.988	ID	0.952	0.971	0.955	0.983	0.377	0.952	0.962
Thismia hexagona	0.379	0.34	0.938	0.33	0.365	0.375	0.377	0.739	0.345	0.959	0.952	ID	0.938	0.922	0.947	0.375	0.919	0.924
Thismia hongkongensis	0.382	0.345	0.969	0.33	0.372	0.377	0.38	0.775	0.34	0.973	0.971	0.938	ID	0.955	0.964	0.377	0.966	0.962
Thismia kelabitiana	0.384	0.352	0.952	0.331	0.37	0.379	0.382	0.781	0.336	0.962	0.955	0.922	0.955	ID	0.948	0.379	0.931	0.95
Thismia neptunis	0.391	0.349	0.962	0.321	0.372	0.386	0.389	0.763	0.33	0.981	0.983	0.947	0.964	0.948	ID	0.386	0.95	0.955
Thismia okhaensis	0.986	0.317	0.375	0.337	0.955	1,000	0.993	0.398	0.319	0.379	0.377	0.375	0.377	0.379	0.386	ID	0.382	0.368
Thismia tentaculata	0.386	0.345	0.945	0.328	0.372	0.382	0.384	0.747	0.325	0.95	0.952	0.919	0.966	0.931	0.95	0.382	ID	0.938
Thismia viridistriata	0.372	0.347	0.959	0.333	0.368	0.368	0.37	0.775	0.33	0.964	0.962	0.924	0.962	0.95	0.955	0.368	0.938	ID
trnfM-CAU
	Thismia alba	Thismia angustimitra	Thismia cornuta	Thismia filiformis	Thismia gardneriana	Thismia hawkesii	Thismia lanternata	Thismia mucronata	Thismia puberula	Thismia hexagona	Thismia hongkongensis	Thismia kelabitiana	Thismia neptunis	Thismia okhaensis	Thismia tentaculata
Thismia alba	ID	0.875	1,000	1,000	1,000	0.972	0.569	0.597	0.944	1,000	0.819	0.972	1,000	0.597	0.986
Thismia angustimitra	0.875	ID	0.875	0.875	0.875	0.847	0.555	0.569	0.875	0.875	0.788	0.875	0.875	0.569	0.861
Thismia cornuta	1,000	0.875	ID	1,000	1,000	0.972	0.569	0.597	0.944	1,000	0.819	0.972	1,000	0.597	0.986
Thismia filiformis	1,000	0.875	1,000	ID	1,000	0.972	0.569	0.597	0.944	1,000	0.819	0.972	1,000	0.597	0.986
Thismia gardneriana	1,000	0.875	1,000	1,000	ID	0.972	0.569	0.597	0.944	1,000	0.819	0.972	1,000	0.597	0.986
Thismia hawkesii	0.972	0.847	0.972	0.972	0.972	ID	0.541	0.569	0.916	0.972	0.791	0.944	0.972	0.569	0.958
Thismia lanternata	0.569	0.555	0.569	0.569	0.569	0.541	ID	0.788	0.569	0.569	0.541	0.583	0.569	0.788	0.555
Thismia mucronata	0.597	0.569	0.597	0.597	0.597	0.569	0.788	ID	0.597	0.597	0.541	0.583	0.597	1,000	0.583
Thismia puberula	0.944	0.875	0.944	0.944	0.944	0.916	0.569	0.597	ID	0.944	0.802	0.916	0.944	0.597	0.93
Thismia hexagona	1,000	0.875	1,000	1,000	1,000	0.972	0.569	0.597	0.944	ID	0.819	0.972	1,000	0.597	0.986
Thismia hongkongensis	0.819	0.788	0.819	0.819	0.819	0.791	0.541	0.541	0.802	0.819	ID	0.791	0.819	0.541	0.833
Thismia kelabitiana	0.972	0.875	0.972	0.972	0.972	0.944	0.583	0.583	0.916	0.972	0.791	ID	0.972	0.583	0.958
Thismia neptunis	1,000	0.875	1,000	1,000	1,000	0.972	0.569	0.597	0.944	1,000	0.819	0.972	ID	0.597	0.986
Thismia okhaensis	0.597	0.569	0.597	0.597	0.597	0.569	0.788	1,000	0.597	0.597	0.541	0.583	0.597	ID	0.583
Thismia tentaculata	0.986	0.861	0.986	0.986	0.986	0.958	0.555	0.583	0.93	0.986	0.833	0.958	0.986	0.583	ID
rpl2 3'
	Thismia angustimitra	Thismia filiformis	Thismia gardneriana	Thismia hawkesii	Thismia lanternata	Thismia mucronata	Thismia puberula	Thismia thaithongiana	Thismia alba	Thismia hexagona	Thismia hongkongensis	Thismia neptunis	Thismia tentaculata
Thismia angustimitra	ID	0.756	0.84	0.773	0.826	0.828	0.84	0.439	0.207	0.756	0.836	0.78	0.797
Thismia filiformis	0.756	ID	0.75	0.707	0.756	0.789	0.798	0.472	0.34	0.912	0.771	0.924	0.831
Thismia gardneriana	0.84	0.75	ID	0.797	0.845	0.751	0.76	0.403	0.219	0.756	0.839	0.777	0.779
Thismia hawkesii	0.773	0.707	0.797	ID	0.901	0.7	0.709	0.457	0.214	0.695	0.771	0.728	0.711
Thismia lanternata	0.826	0.756	0.845	0.901	ID	0.745	0.754	0.443	0.206	0.74	0.823	0.768	0.76
Thismia mucronata	0.828	0.789	0.751	0.7	0.745	ID	0.987	0.451	0.268	0.792	0.765	0.813	0.828
Thismia puberula	0.84	0.798	0.76	0.709	0.754	0.987	ID	0.46	0.268	0.798	0.771	0.825	0.834
Thismia thaithongiana	0.439	0.472	0.403	0.457	0.443	0.451	0.46	ID	0.296	0.478	0.436	0.469	0.46
Thismia alba	0.207	0.34	0.219	0.214	0.206	0.268	0.268	0.296	ID	0.328	0.222	0.34	0.298
Thismia hexagona	0.756	0.912	0.756	0.695	0.74	0.792	0.798	0.478	0.328	ID	0.762	0.897	0.819
Thismia hongkongensis	0.836	0.771	0.839	0.771	0.823	0.765	0.771	0.436	0.222	0.762	ID	0.78	0.774
Thismia neptunis	0.78	0.924	0.777	0.728	0.768	0.813	0.825	0.469	0.34	0.897	0.78	ID	0.843
Thismia tentaculata	0.797	0.831	0.779	0.711	0.76	0.828	0.834	0.46	0.298	0.819	0.774	0.843	ID
rps4
	Thismia angustimitra	Thismia filiformis	Thismia gardneriana	Thismia hawkesii	Thismia lanternata	Thismia mucronata	Thismia puberula	Thismia thaithongiana	Thismia hongkongensis	Thismia kelabitiana	Thismia tentaculata
Thismia angustimitra	ID	0.719	0.808	0.778	0.746	0.93	0.918	0.336	0.808	0.705	0.724
Thismia filiformis	0.719	ID	0.807	0.719	0.69	0.719	0.727	0.36	0.69	0.701	0.688
Thismia gardneriana	0.808	0.807	ID	0.756	0.75	0.813	0.81	0.361	0.744	0.712	0.735
Thismia hawkesii	0.778	0.719	0.756	ID	0.827	0.793	0.793	0.351	0.778	0.737	0.712
Thismia lanternata	0.746	0.69	0.75	0.827	ID	0.751	0.754	0.331	0.746	0.777	0.779
Thismia mucronata	0.93	0.719	0.813	0.793	0.751	ID	0.98	0.349	0.798	0.702	0.732
Thismia puberula	0.918	0.727	0.81	0.793	0.754	0.98	ID	0.349	0.798	0.702	0.739
Thismia thaithongiana	0.336	0.36	0.361	0.351	0.331	0.349	0.349	ID	0.367	0.348	0.331
Thismia hongkongensis	0.808	0.69	0.744	0.778	0.746	0.798	0.798	0.367	ID	0.69	0.774
Thismia kelabitiana	0.705	0.701	0.712	0.737	0.777	0.702	0.702	0.348	0.69	ID	0.689
Thismia tentaculata	0.724	0.688	0.735	0.712	0.779	0.732	0.739	0.331	0.774	0.689	ID
rps8
	Thismia angustimitra	Thismia filiformis	Thismia gardneriana	Thismia hawkesii	Thismia lanternata	Thismia mucronata	Thismia puberula	Thismia thaithongiana	Thismia hongkongensis
Thismia angustimitra	ID	0.713	0.816	0.853	0.846	0.935	0.933	0.411	0.866
Thismia filiformis	0.713	ID	0.675	0.688	0.69	0.698	0.702	0.504	0.707
Thismia gardneriana	0.816	0.675	ID	0.856	0.856	0.831	0.839	0.413	0.846
Thismia hawkesii	0.853	0.688	0.856	ID	0.96	0.881	0.888	0.398	0.893
Thismia lanternata	0.846	0.69	0.856	0.96	ID	0.873	0.886	0.393	0.896
Thismia mucronata	0.935	0.698	0.831	0.881	0.873	ID	0.982	0.406	0.876
Thismia puberula	0.933	0.702	0.839	0.888	0.886	0.982	ID	0.405	0.883
Thismia thaithongiana	0.411	0.504	0.413	0.398	0.393	0.406	0.405	ID	0.393
Thismia hongkongensis	0.866	0.707	0.846	0.893	0.896	0.876	0.883	0.393	ID
rps3
	Thismia gardneriana	Thismia hawkesii	Thismia lanternata	Thismia mucronata	Thismia puberula	Thismia thaithongiana	Thismia tentaculata	Thismia hongkongensis
Thismia gardneriana	ID	0.731	0.728	0.702	0.705	0.582	0.613	0.702
Thismia hawkesii	0.731	ID	0.904	0.734	0.735	0.621	0.585	0.766
Thismia lanternata	0.728	0.904	ID	0.753	0.751	0.622	0.599	0.787
Thismia mucronata	0.702	0.734	0.753	ID	0.966	0.598	0.592	0.742
Thismia puberula	0.705	0.735	0.751	0.966	ID	0.598	0.595	0.746
Thismia thaithongiana	0.582	0.621	0.622	0.598	0.598	ID	0.485	0.616
Thismia tentaculata	0.613	0.585	0.599	0.592	0.595	0.485	ID	0.612
Thismia hongkongensis	0.702	0.766	0.787	0.742	0.746	0.616	0.612	ID
Supplementary Table 5. Pairwise distances of Thismia plastid genes.

## Sheet: Supplementary Table 6
Gene	dN/dS in Thismia species	dN/dS in photosynthetic plants	p-value	q-value
accD	0.41	0.29	0.00199466	0.003134
rpl2	0.33	0.23	0.0665156	0.091459
rps2	0.44	0.13	7.63859e-10	2.1e-09
rps3	0.4	0.12	5.58509e-11	3.07e-10
rps3, sequences with atypical start codon excluded	0.47	0.12	3.62777e-10	1.33e-09
rps4	0.37	0.1	1.4625e-12	1.61e-11
rps4, sequences with atypical start codon excluded	0.34	0.1	1.82063e-09	4.01e-09
rps8	0.23	0.26	0.425885	0.425885
rps8, sequences with atypical start codon excluded	0.26	0.26	0.190964	0.223819
rps12	0.35	0.03	1.84567e-05	3.38e-05
rps18	0.47	0.33	0.203472	0.223819
Supplementary Table 6. Estimates of selective pressure in Thismia and their photosynthetic relatives calculated using a multiple alignment not pruned by Gblocks. P-values and q-values indicate statistical significance of the hypothesis of the difference of dN/dS values between photosynthetic and non-photosynthetic species.

## Sheet: Supplementary Table 7
Gene	dN/dS in Thismia species	dN/dS in photosynthetic plants	p-value	q-value
accD	0.37	0.29	0.0103546	0.016272
rpl2	0.29	0.23	0.280514	0.36456
rps2	0.39	0.13	3.36031e-06	1.23e-05
rps3	0.36	0.12	0.00011206	0.000308
rps3, sequences with atypical start codon excluded	0.48	0.12	3.96986e-07	2.18e-06
rps4	0.32	0.1	0.000166892	0.000367
rps4, sequences with atypical start codon excluded	0.38	0.1	3.51974e-07	2.18e-06
rps8	0.12	0.25	0.885726	0.885726
rps8, sequences with atypical start codon excluded	0.21	0.25	0.331418	0.36456
rps12	0.35	0.03	0.30254	0.365
rps18	0.42	0.31	0.00838655	0.015375
Supplementary Table 7. Estimates of selective pressure in Thismia and their photosynthetic relatives calculated using a multiple alignment pruned by Gblocks with default parameters. P-values and q-values indicate statistical significance of the hypothesis of the difference of dN/dS values between photosynthetic and non-photosynthetic species.

## Sheet: Supplementary Table 8
Species	Spearman correlation between amino acid frequency and AT-richness of the codons.
Thismia filiformis	0.44673
Thismia gardneriana	0.43698
Thismia hawkesii	0.45444
Thismia lanternata	0.43618
Thismia mucronata	0.42015
Thismia puberula	0.43228
Thismia tentaculata	0.44673
Thismia thaithongiana	0.54909
Burmannia coelestis	0.22257
Burmannia disticha	0.08167
Tacca chantrieri	0.03728
Tacca leontopetaloides	0.07379
Supplementary Table 8. Tendency towards amino acids with AT-rich codons.

## Sheet: Supplementary Table 9
name	length	coverage	coordinate	genes located in the region
Thismia_puberula_trans_contig_14	2795	2208.39	7018-9812, 16484-13690	rps12 1 exon (partial), rps18, accD, trnE, rpl2 1 exon (partial)
Thismia_puberula_trans_contig_3430	1026	617.366	10775-9750, 12727-13752	rpl2 1 exon (partial), intron, 2 exon (partial)
Thismia_puberula_trans_contig_2449	1922	389.888	6655-4734, 16847-18768	rrn16 (partial), rps12 2 exon, rrn5, rps2
Thismia_puberula_trans_contig_8078	353	21.6601	6685-7037, 16465-16817	rps12 1 exon (partial)
Thismia_puberula_trans_contig_17245	371	195.412	12418-12788, 10714-10775	rps3 (partial), rpl2 2 exon (partial)
Thismia_puberula_trans_contig_12616	1615	70.317	1-1551, 18706- 18768	rrn16 (partial)
Thismia_puberula_trans_contig_3232	641	430.339	2115-1964	rrn23 (partial)
Thismia_puberula_trans_contig_3735	1909	193.949	2054-3935	rrn23 (partial)
Thismia_puberula_trans_contig_9198	668	445.154	4309-4796, 18768-18706	rrn23 (partial), rrn16 (partial)
Thismia_puberula_trans_contig_39517	414	65.8696	4393-3980	rrn23 (partial)
Thismia_puberula_trans_contig_43586	391	128.76	10713-11103, 12789-12727	rpl2 2 exon (partial), trnM, rps4 (partial)
Supplementary table 9. Thismia puberula transcriptome contigs corresponding to plastid genome.
